# Supplementary material for: A highly efficient bifunctional electrocatalyst (ORR/OER) derived from GO functionalized with carbonyl, hydroxyl and epoxy groups for rechargeable zinc–air batteries
Source: Royal Society of Chemistry journal article supplement (doi:10.1039/d1nj00837d), 2021-01-01
Supplement: d1nj00837d1.pdf [file d1nj00837d1.pdf]

## *Supporting information*

# **Highly Efficient Bifunctional Electrocatalyst (ORR/OER) Derived from GO Functionalized with Carbonyl, Hydroxyl and Epoxy Groups for Rechargeable Zinc-Air Batteries**

Lei Gu, Xuan-Long Sun, Jiao Zhao, Bing-Quan Gong, Zheng-Lv Bao, Hai-Lang Jia\*, Ming-Yun Guan and Shuai-Shuai Ma\*

School of Chemical and Environmental Engineering, Institute of Advanced Functional Materials for Energy, Jiangsu University of Technology, Changzhou 213001, P. R. China.

### **Electrochemical measurements**

A conventional three-electrode system was employed to evaluate the electrocatalytic performance of the obtained catalyst on a CHI 760E electrochemical workstation. A rotating disk electrode (RDE) with a glassy carbon (GC) disk (electrode area: 0.1256 cm<sup>2</sup>) was used as the working electrode, Ag/AgCl was used as the reference electrode, and platinum wire was used as the counter electrode. The rotating ring disk electrode measurements for ORR were carried out on RRDE in a N<sub>2</sub> or O<sub>2</sub>-saturated 0.1 M KOH electrolyte solution at a scan rate of 10 mV/s. The rotating ring disk electrode measurements for OER was carried out in 1 M KOH electrolyte solution at a scan rate of 10 mV/s. For ORR, before the electrochemical measurements, the electrolyte solution was purged with O<sub>2</sub> for 30 min to achieve an O<sub>2</sub>-saturated solution, and stable polarization curves were recorded after 20 cycles. All the potentials were converted to the potential versus the reversible hydrogen electrode (RHE) according to  $E_{vsRHE} = E_{vsAg/AgCl} + E_0Ag/AgCl + 0.059 \text{ pH}$ .

Rotating ring-disk electrode (RRDE) measurements were recorded with catalyst inks and electrodes prepared by the same method as that for the RDE measurements. The H<sub>2</sub>O<sub>2</sub> produced and the electron number (n) transferred during the ORR were

calculated using the following equations:

$$n = 4 \frac{I_D}{I_D + I_R/N}$$

$$\text{H}_2\text{O}_2\% = 100 \times \frac{4 - n}{2}$$

The rotating ring-disk electrode was employed to detect the  $\text{H}_2\text{O}_2$  yield, where the ring potential was set to 1.3 V (vs. RHE). where  $I_D$  is the Faradaic current at the disk,  $I_R$  is the Faradaic current at the ring, and  $N= 0.37$  is the collection efficiency of ring electrode.

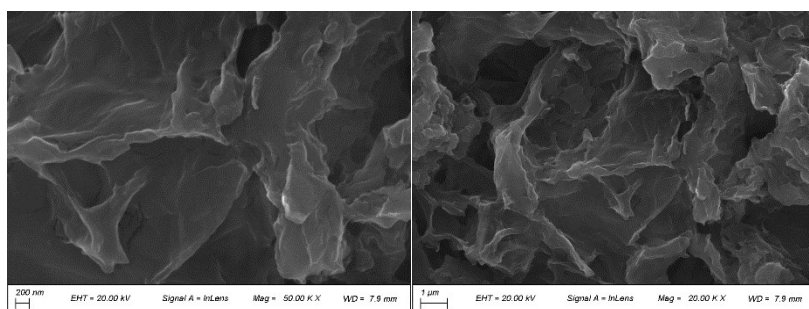

**Fig. S1** SEM of Co-N/rGO.

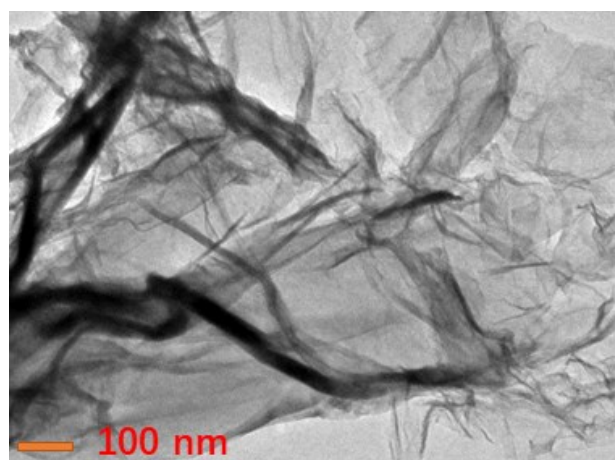

Fig. S2 TEM of Co-N/rGO.

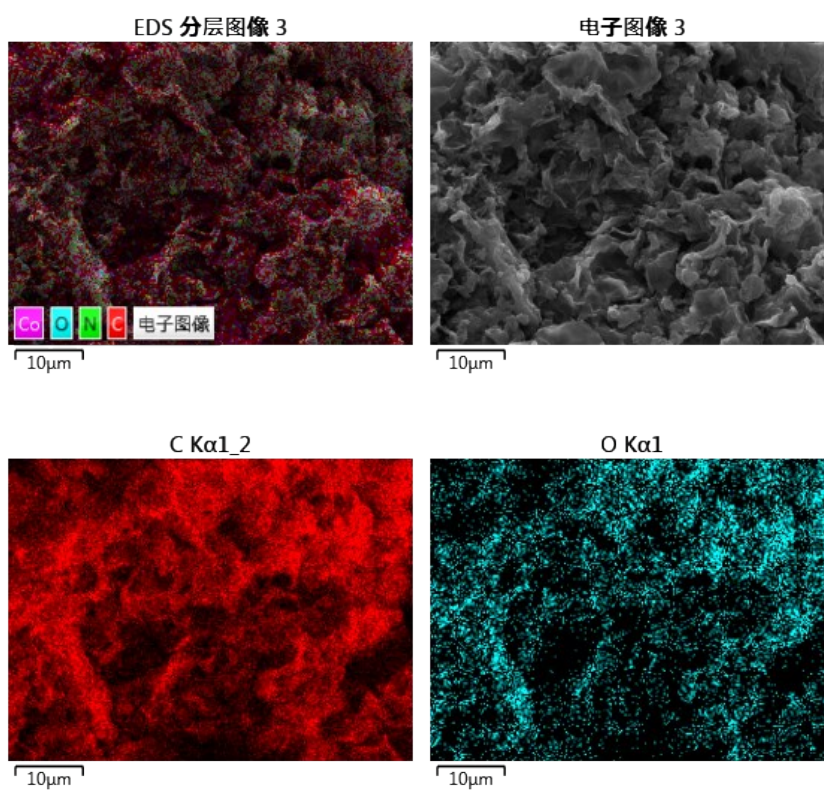

EDS 分层图像 3

电子图像 3

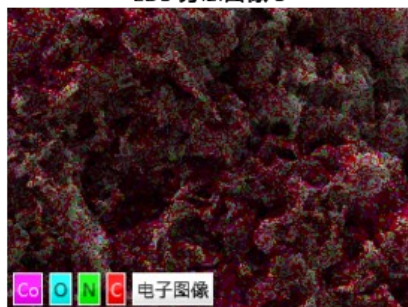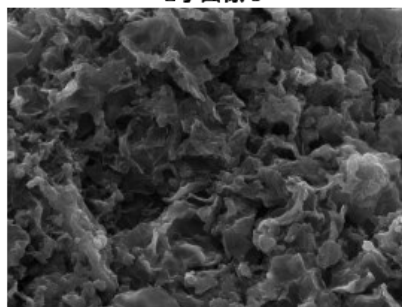

10 μm

10 μm

C Kα1,2

O Kα1

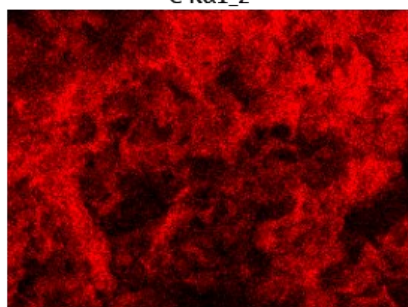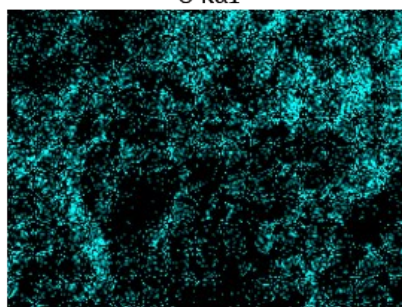

10 μm

10 μm

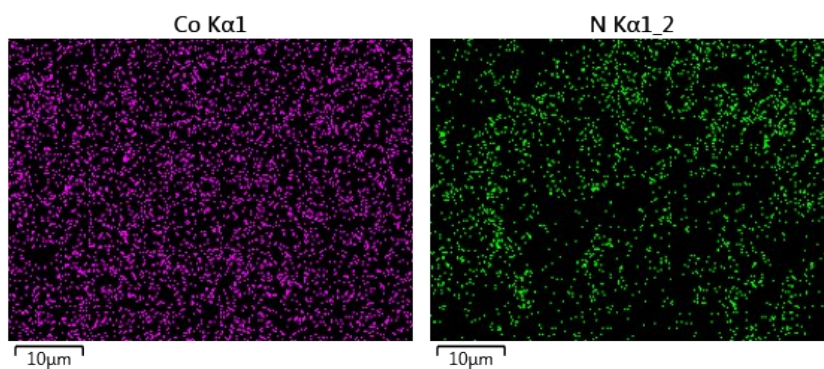

**Fig. S3** EDS of Co-N/rGO.

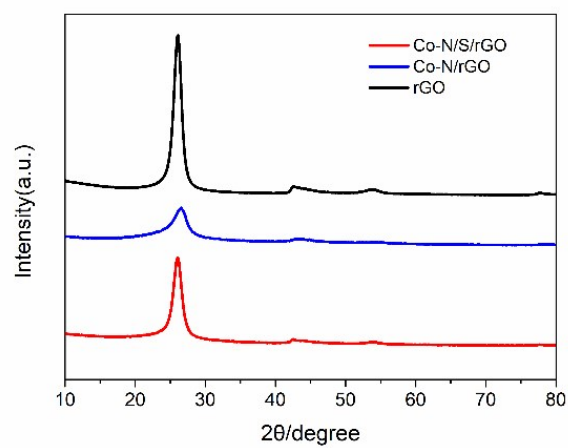

**Fig. S4** XRD of Co-N/S/rGO, Co-N/rGO and rGO.

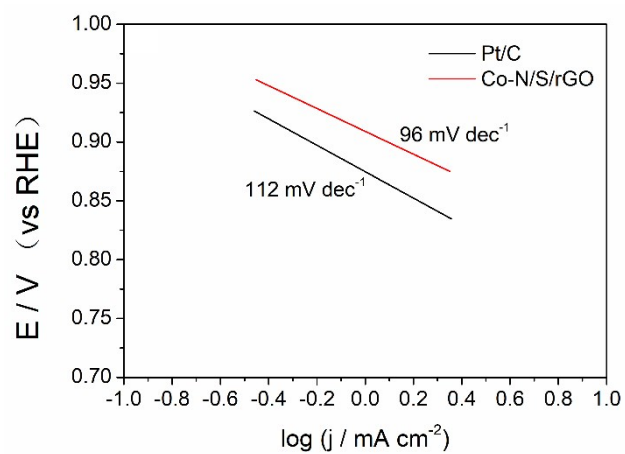

**Fig. S5** Tafel plots of Co-N/S/rGO and Pt/C for ORR.

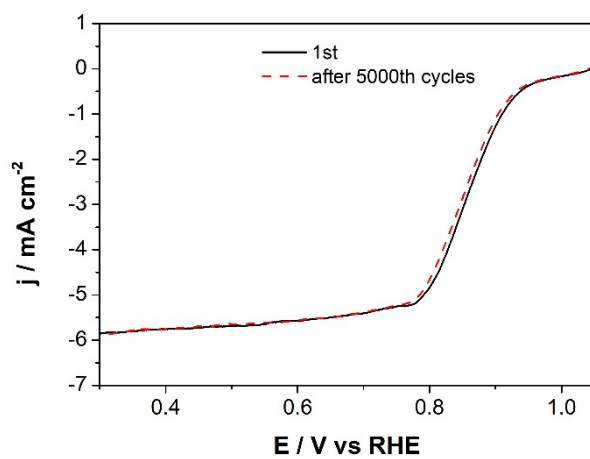

**Fig. S6** LSVs of Co-N/S/rGO catalysts before and after 5000 cycles in  $\text{O}_2$ -saturated 0.1 M KOH.

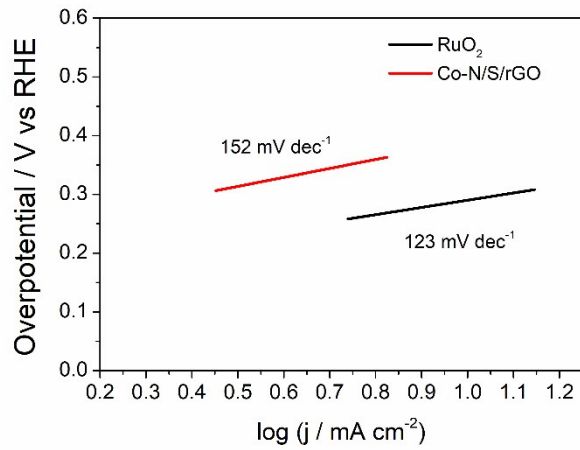

**Fig. S7** Tafel plots of Co-N/S/rGO and Pt/C for OER.

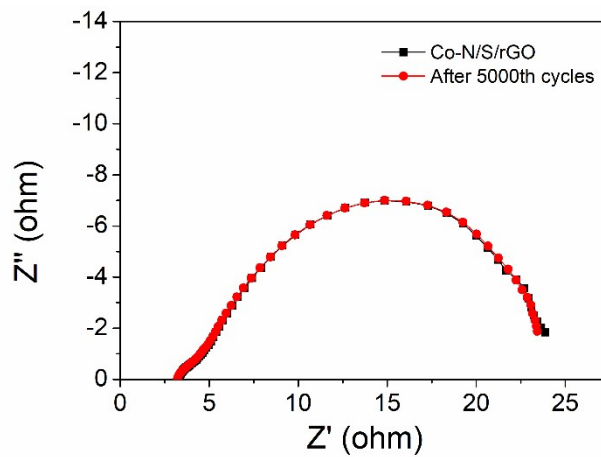

**Fig. S8** EIS of Co-N/S/rGO catalysts before and after 5000 cycles in 1 M KOH for OER.

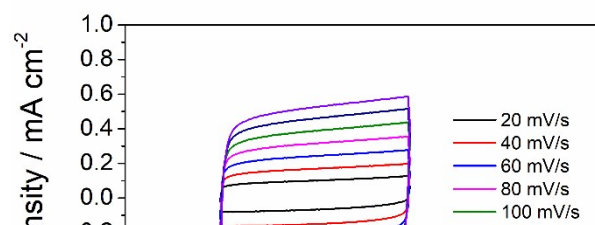

**Fig. S9** CV curves of Co-N/rGO at different scan rates in 1.0 M KOH solution.

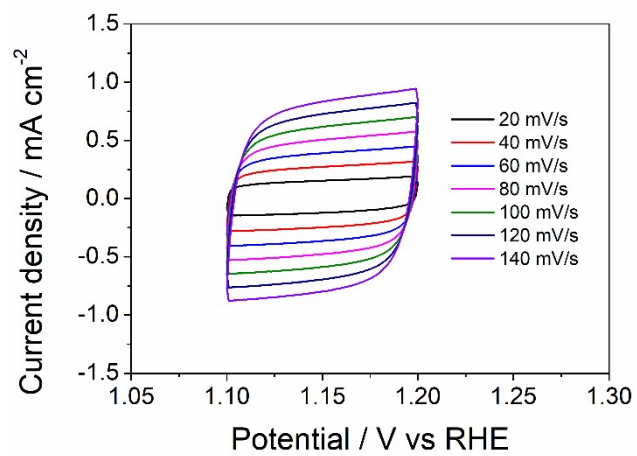

**Fig. S10** CV curves of Co-N/S/rGO at different scan rates in 1.0 M KOH solution.

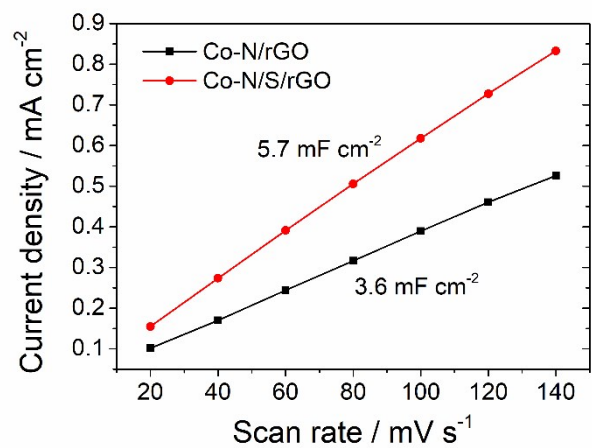

**Fig. S11** Double-layer capacitance for different samples.

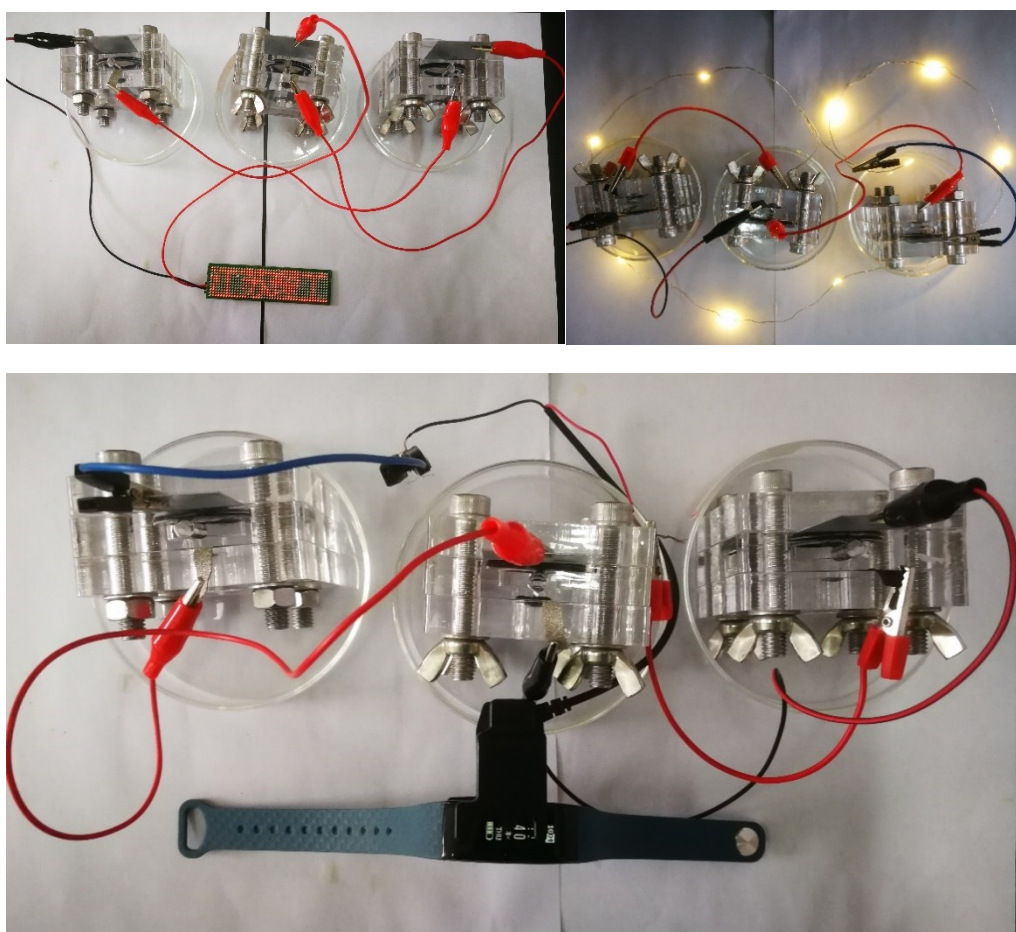

**Fig. S12** Images of the Co-N/S/rGO based ZABs in series power a light emitting diode (LED) array and charge the smart bracelet, the working voltage is 3.7-5 V.
